# Supplementary material
Source: PubMed Central journal article supplement (PMC7022363)
Supplement: JVI.01644-19-s0001.pdf [file JVI.01644-19-s0001.pdf]

1 **Supplementary Table 1: List of antibodies used for flow cytometry**

| <b>Name</b>       | <b>Fluorochrome</b> | <b>Clone</b> | <b>Company</b>                    |
|-------------------|---------------------|--------------|-----------------------------------|
| $\alpha 4\beta 7$ | APC                 | A4B7         | NHP Reagent Resource              |
| CD3               | A700, APC-Cy7       | SP34.2       | BD Biosciences                    |
| CD3               | V450                | SP34.2       | BD Biosciences                    |
| CD4               | BV711               | L200         | BD Biosciences                    |
| CD8               | PAC BLUE            | RPA-T8       | BD Biosciences                    |
| CD14              | BV650               | M5E2         | BD Biosciences                    |
| CD20              | BUV395              | L27          | BD Biosciences                    |
| CD45              | BV605, BV786        | D058-1283    | BD Biosciences                    |
| CD62L             | BV711               | SK11         | BD Biosciences                    |
| CD103             | BUV737              | Ber-ACT8     | BD Biosciences                    |
| CD107a            | BV421               | H4A3         | BD Biosciences                    |
| CD117             | BV711               | 104D2        | BIOLEGEND                         |
| CD127             | PE-Cy7              | eBIORDR5     | Thermo-Fisher (Life Technologies) |
| CD159a            | APC, PE-Cy7         | Z199         | BD Biosciences                    |
| CD183             | BUV395              | 1C6/CXCR3    | BD Biosciences                    |
| CD195             | BV650               | 3A9          | BD Biosciences                    |
| CD336             | PE, PE-Cy5          | Z231         | Beckman Coulter                   |
| Granz B           | PE CF594            | GB11         | BD Biosciences                    |
| HLA-DR            | APC-H7              | G46-6        | BD Biosciences                    |
| HLA-DR            | ECD                 | IMMU-357     | Beckman Coulter                   |
| IFN- $\gamma$     | BUV395              | B27          | BD Biosciences                    |
| IL-17             | PE-Dazzle594        | BL168        | BioLegend                         |
| IL-22             | APC                 | IL22JOP      | ThermoFisher                      |
| Ki-67             | A488                | B56          | BD Biosciences                    |
| MIP-1 $\beta$     | FITC                | D21-1351     | BD Biosciences                    |
| ROR $\gamma$ t    | PE                  | AFKJS-9      | Thermo-Fisher (Life Technologies) |
| TNF- $\alpha$     | BV650               | Mab11        | BD Biosciences                    |
